# Supplementary material for: Declines over the last two decades of five intertidal invertebrate species in the western North Atlantic
Source: PubMed Central journal article supplement (PMC7576203; doi:10.1038/s42003-020-01326-0), 2020-10-20
Supplement: 42003_2020_1326_MOESM1_ESM.pdf [file 42003_2020_1326_MOESM1_ESM.pdf]

Supplementary Fig. 1: Monthly mean temperatures (°C) from 2002 to 2018.

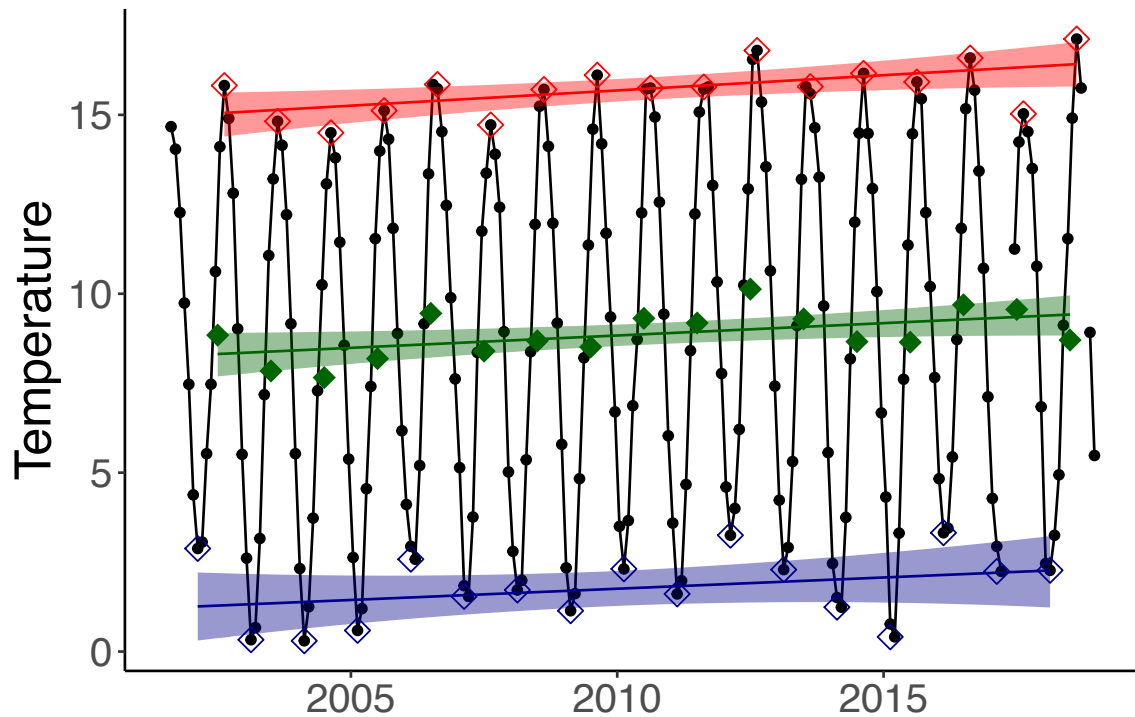

Sinusoidal curve is plotted through the monthly means (black dots). Data for monthly means can be found in Supplementary Data 1. Lines are Bayesian estimates of slopes and intercepts, and shaded regions are 95% credible intervals (see Supplementary Table 6 for details). Red regression line and shading are for early maximum temperature, blue is yearly minimum and green is yearly average.

**Supplementary Table 1.** Bayesian estimates of fixed effects from Poisson regressions of abundances and recruitment over time and shown in Figure 1. Models done using number per m<sup>2</sup> for LL, LO, TT and NL; square root of number per 36 cm<sup>2</sup> for SB; number per sampling unit (40 cm<sup>2</sup>) for ME. Codes are: LL=*L. littorea*, LO=*L. obtusata*, TT=*T. testudinalis*, NL=*N. lapillus*, SB=*S. balanoides*, ME=*M. edulis*. Column labeled pMCMC gives the proportion of runs for which the estimate of the posterior mean was  $\leq 0$ .

| Species | Term      | posterior mean | lower 95% credible limit | upper 95% credible limit | effective sample size | pMCMC  |
|---------|-----------|----------------|--------------------------|--------------------------|-----------------------|--------|
| LL      | Intercept | 69.140         | 47.543                   | 89.589                   | 2,000                 | 0.0005 |
|         | Year      | -0.032         | -0.042                   | -0.022                   | 2,000                 | 0.0005 |
| LO      | Intercept | -17.303        | -54.074                  | 19.280                   | 2,000                 | 0.3430 |
|         | Year      | 0.010          | -0.008                   | 0.029                    | 2,000                 | 0.2750 |
| TT      | Intercept | 125.298        | 60.452                   | 205.229                  | 2,151                 | 0.0005 |
|         | Year      | -0.063         | -0.098                   | -0.026                   | 2,149                 | 0.0005 |
| NL      | Intercept | 76.896         | 26.902                   | 131.423                  | 2,000                 | 0.0070 |
|         | Year      | -0.038         | -0.065                   | -0.013                   | 2,000                 | 0.0070 |
| SB      | Intercept | 50.800         | 6.420                    | 103.455                  | 2,000                 | 0.0420 |
|         | Year      | -0.025         | -0.051                   | -0.003                   | 2,000                 | 0.0440 |
| ME      | Intercept | 319.058        | 271.294                  | 371.278                  | 2,000                 | 0.0005 |
|         | Year      | -0.157         | -0.183                   | -0.134                   | 2,000                 | 0.0005 |

**Supplementary Table 2.** Percent change per year and half-life in years for gastropod abundances and recruitment by mussels and barnacles based on data in Table 1. See Table 1 for codes for species. Note that Poisson estimates for barnacle recruits in Table 1 are based on square root transformed data, and so values in this table were back-transformed.

| Species | Percent change per year |                          |                          | Half-life in years |                          |                          |
|---------|-------------------------|--------------------------|--------------------------|--------------------|--------------------------|--------------------------|
|         | posterior mean          | lower 95% credible limit | upper 95% credible limit | posterior mean     | lower 95% credible limit | upper 95% credible limit |
| LL      | -3.2%                   | -4.2%                    | -2.2%                    | 21                 | 16                       | 32                       |
| LO      | 1.0%                    | -0.8%                    | 2.9%                     | -70                | 91                       | -24                      |
| TT      | -6.3%                   | -9.8%                    | -2.6%                    | 11                 | 7                        | 27                       |
| NL      | -3.8%                   | -6.5%                    | -1.3%                    | 18                 | 11                       | 53                       |
| SB      | -5.0%                   | -10.2%                   | -0.5%                    | 14                 | 7                        | 136                      |
| ME      | -15.7%                  | -18.3%                   | -13.4%                   | 4                  | 4                        | 5                        |

**Supplementary Table 3.** Best supported models of the effects on environmental factors on abundance and recruitment. Estimates are based on pooled estimates from 10 runs of imputed values and so differ from estimates in Supplementary Tables 4 and 5, which dropped missing values. See Table 1 for species codes. Results are pooled estimates based on imputed values for environmental data. Results of LL, LO, NL and TT are numbers per m<sup>2</sup>; barnacle (SB) data are square root transform of number per 36 cm<sup>2</sup>; mussel (ME) data are log<sub>10</sub> transform of counts per 40 cm<sup>2</sup>. T=temperature, and  $\Omega$  = saturation ratio.

| Species | Parameter                | Estimate | SE      | z value | P       |
|---------|--------------------------|----------|---------|---------|---------|
| LL      | Intercept                | 534.00   | 91.10   | 5.86    | >0.0001 |
|         | One-year lag in T        | -49.30   | 10.30   | -4.81   | >0.0001 |
| LO      | Intercept                | 2427.40  | 3300.00 | 0.74    | 0.4620  |
|         | One-year lag in $\Omega$ | -186.00  | 62.60   | -2.97   | 0.0029  |
|         | One-year lag in pH       | -254.60  | 408.90  | -0.62   | 0.5335  |
|         | Intercept                | 371.60   | 117.80  | 3.15    | 0.0016  |
|         | One-year lag in $\Omega$ | -182.10  | 61.90   | -2.94   | 0.0032  |
| TT      | Intercept                | 17.54    | 5.37    | 3.27    | 0.0011  |
|         | One-year lag in $\Omega$ | -8.43    | 2.82    | -2.99   | 0.0028  |
| NL      | Intercept                | 74.40    | 26.20   | 2.84    | 0.0046  |
|         | One-year lag in $\Omega$ | -36.30   | 13.80   | -2.64   | 0.0083  |
| ME      | Intercept                | 8.08     | 1.56    | 5.20    | >0.0001 |
|         | T in August              | -0.38    | 0.15    | -2.44   | 0.0150  |
|         | T in July                | -0.05    | 0.13    | -0.39   | 0.6950  |
|         | Intercept                | 8.19     | 1.48    | 5.54    | >0.0001 |
|         | T in August              | -0.43    | 0.09    | -4.54   | >0.0001 |
| SB      | Intercept                | -89.25   | 777.53  | -0.11   | 0.9100  |
|         | T in February            | 0.53     | 1.75    | 0.30    | 0.7600  |
|         | T in March               | -0.86    | 1.71    | -0.50   | 0.6100  |
|         | Current year pH          | 11.81    | 96.66   | 0.12    | 0.9000  |
|         | Intercept                | 5.47     | 1.43    | 3.83    | 0.0001  |
|         | T in February            | -0.33    | 0.66    | -0.51   | 0.6111  |
|         | Intercept                | 5.86     | 1.51    | 3.87    | 0.0001  |
|         | T in March               | -0.47    | 0.65    | -0.72   | 0.4739  |

**Supplementary Table 4.** Parameter estimates for the best-supported models of regressions of snail abundances versus environmental data. Based on data in Supplementary Data 1. Column abbreviations are: Spp = species ID, Int = intercept,  $\Omega$  = saturation ratio, pH = pH, T = water temperature, LL = log-likelihood ratio, AICc = corrected Akaike information criterion, delta = Akaike delta, Wt = Akaike weight. Species IDs are: LL=*L. littorea*, LO=*L. obtusata*, NL=*N. lapillus*, TT=*T. testudinalis*. Subscripts denote: 0 = current year, 1 = previous year.

| Spp | Int      | $\Omega_0$ | $\Omega_1$ | pH <sub>0</sub> | pH <sub>1</sub> | T <sub>0</sub> | T <sub>1</sub> | LL     | AICc  | delta | Wt    |
|-----|----------|------------|------------|-----------------|-----------------|----------------|----------------|--------|-------|-------|-------|
| LL  | 594.4    |            |            |                 |                 |                | -54.8          | -45.03 | 100.1 | 0.00  | 0.741 |
|     | -18840.0 |            |            | 2406.0          |                 |                | -45.6          | -43.83 | 103.7 | 3.60  | 0.123 |
|     | -14860.0 |            |            |                 | 1913.0          |                | -47.6          | -44.38 | 104.8 | 4.69  | 0.071 |
|     | -37410.0 | -482.5     |            |                 | 4779.0          |                |                | -44.48 | 104.9 | 4.88  | 0.065 |
| LO  | -19180.0 |            | -224.4     |                 | 2442.0          |                |                | -34.98 | 85.9  | 0.00  | 0.568 |
|     | 238.5    |            |            |                 |                 |                | -23.2          | -39.44 | 88.9  | 2.93  | 0.131 |
|     | 556.2    | -275.3     |            |                 |                 |                |                | -39.54 | 89.1  | 3.13  | 0.119 |
|     | 720.4    | -200.8     | -161.9     |                 |                 |                |                | -36.75 | 89.5  | 3.54  | 0.097 |
|     | 487.4    | -170.9     |            |                 |                 |                | -14.7          | -36.87 | 89.7  | 3.79  | 0.086 |
| NL  | 7.1      |            |            |                 |                 |                |                | -29.22 | 64.2  | 0.00  | 0.452 |
|     | 72.8     |            | -34.8      |                 |                 |                |                | -28.12 | 66.2  | 2.08  | 0.160 |
|     | -2887.0  |            |            | 359.9           |                 |                |                | -28.36 | 66.7  | 2.56  | 0.125 |
|     | 24.2     |            |            |                 |                 |                | -1.9           | -28.76 | 67.5  | 3.36  | 0.084 |
|     | 36.9     | -15.7      |            |                 |                 |                |                | -29.01 | 68.0  | 3.87  | 0.065 |
|     | -1159.0  |            |            |                 | 145.0           |                |                | -29.10 | 68.2  | 4.05  | 0.060 |
|     | 3.8      |            |            |                 |                 | 0.4            |                | -29.21 | 68.4  | 4.26  | 0.054 |
| TT  | 1.4      |            |            |                 |                 |                |                | -10.76 | 27.2  | 0.00  | 0.272 |
|     | 14.8     |            | -7.1       |                 |                 |                |                | -8.77  | 27.5  | 0.29  | 0.235 |
|     | 13.8     | -6.6       |            |                 |                 |                |                | -9.08  | 28.2  | 0.92  | 0.171 |
|     | 5.9      |            |            |                 |                 |                | -0.5           | -9.34  | 28.7  | 1.44  | 0.132 |
|     | 5.4      |            |            |                 |                 | -0.5           |                | -9.80  | 29.6  | 2.36  | 0.084 |
|     | -260.0   |            |            | 32.5            |                 |                |                | -10.50 | 31.0  | 3.75  | 0.042 |
|     | -247.8   |            |            |                 | 31.0            |                |                | -10.54 | 31.1  | 3.84  | 0.040 |
|     | 19.0     | -4.2       | -5.1       |                 |                 |                |                | -8.03  | 32.1  | 4.82  | 0.024 |

**Supplementary Table 5.** Parameters for best-supported models of barnacle and mussel recruitment versus environmental data for delta less than five. Based on data in Supplementary Data 1. Column abbreviations are: Spp = species ID, Int = intercept,  $\Omega$  = saturation ratio, pH = pH, logL = log-likelihood ratio, AICc = corrected Akaike information criterion, delta = Akaike delta, Wt = Akaike weight. Species IDs are: SB = *S. balanoides*, ME = *M. edulis*.

| Spp     | Int      | Feb   | Mar   | Apr   | May   | $\Omega$ | pH     | logL   | AICc  | delta | Wt    |
|---------|----------|-------|-------|-------|-------|----------|--------|--------|-------|-------|-------|
| SB      | 5.39     |       |       |       |       |          |        | -27.48 | 60.50 | 0.00  | 0.485 |
|         | -1137.00 |       |       |       |       |          | 142.10 | -26.91 | 63.20 | 2.79  | 0.120 |
|         | 4.19     | 0.69  |       |       |       |          |        | -27.17 | 63.80 | 3.32  | 0.092 |
|         | 4.11     |       | 0.63  |       |       |          |        | -27.24 | 63.90 | 3.46  | 0.086 |
|         | 3.23     |       |       | 0.47  |       |          |        | -27.36 | 64.10 | 3.70  | 0.076 |
|         | -2.85    |       |       |       |       | 4.33     |        | -27.44 | 64.30 | 3.85  | 0.071 |
|         | 3.52     |       |       |       |       | 0.23     |        | -27.45 | 64.30 | 3.88  | 0.070 |
| ME      | Int      | May   | Jun   | Jul   | Aug   | $\Omega$ | pH     | logL   | AICc  | delta | Wt    |
|         | 6.93     |       |       |       | -0.35 |          |        | 1.00   | 8.00  | 0.00  | 0.262 |
|         | 4.24     |       |       | -0.19 |       |          |        | 0.24   | 9.50  | 1.52  | 0.123 |
|         | 3.50     | -0.24 |       |       |       |          |        | 0.23   | 9.50  | 1.53  | 0.122 |
|         | 4.26     |       | -0.23 |       |       |          |        | -0.02  | 10.00 | 2.04  | 0.094 |
|         | 3.99     |       |       |       | -0.61 | 3.67     |        | 2.81   | 10.40 | 2.39  | 0.079 |
|         | -289.20  |       |       |       |       |          | 36.15  | -0.32  | 10.60 | 2.64  | 0.070 |
|         | -169.30  |       |       |       | -0.27 |          | 21.75  | 2.44   | 11.10 | 3.12  | 0.055 |
|         | -206.70  |       |       | -0.15 |       |          | 26.15  | 2.36   | 11.30 | 3.28  | 0.051 |
|         | 1.48     |       |       |       |       |          |        | -2.86  | 11.40 | 3.43  | 0.047 |
|         | -198.20  | -0.18 |       |       |       |          | 25.02  | 2.04   | 11.90 | 3.91  | 0.037 |
|         | -212.00  |       |       |       | -0.56 | 4.36     | 26.60  | 6.49   | 12.00 | 4.03  | 0.035 |
| -198.10 |          | -0.17 |       |       |       | 25.07    | 1.65   | 12.70  | 4.70  | 0.025 |       |

**Supplementary Table 6.** Bayesian estimates of intercept and slope from regressions of temperature (°C) versus time. Independent variables are: mean monthly temperature in February (yearly minimum), March (best predictor for barnacle recruitment), August (yearly maximum and best predictor for mussel recruitment), the yearly median, yearly mean and yearly mean for the decade starting in 2003.

| Model                 | Term      | posterior mean | lower 95% credible limit | upper 95% credible limit | effective sample size | pMCMC |
|-----------------------|-----------|----------------|--------------------------|--------------------------|-----------------------|-------|
| Minimum               | Intercept | -126.372       | -356.922                 | 59.635                   | 2000                  | 0.208 |
|                       | February  | 0.064          | -0.029                   | 0.178                    | 2000                  | 0.202 |
| March                 | Intercept | -121.946       | -356.817                 | 98.653                   | 2000                  | 0.281 |
|                       | March     | 0.062          | -0.048                   | 0.179                    | 2000                  | 0.268 |
| Maximum               | Intercept | -154.390       | -280.116                 | -26.253                  | 2000                  | 0.023 |
|                       | August    | 0.085          | 0.022                    | 0.148                    | 2000                  | 0.016 |
| Median                | Intercept | -211.310       | -331.819                 | -69.504                  | 1964                  | 0.004 |
|                       | Median    | 0.110          | 0.039                    | 0.170                    | 1964                  | 0.003 |
| Mean                  | Intercept | -129.900       | -249.000                 | -0.488                   | 2000                  | 0.044 |
|                       | Mean      | 0.069          | 0.005                    | 0.128                    | 2000                  | 0.034 |
| Mean<br>(2004 - 2014) | Intercept | -244.400       | -492.200                 | 27.210                   | 2000                  | 0.063 |
|                       | Mean      | 0.126          | -0.009                   | 0.249                    | 2000                  | 0.060 |

**Supplementary Table 7.** Bayesian estimates of random effects from Poisson regressions shown in Figure 1. Models done using number per m<sup>2</sup> for LL, LO, TT and NL; square root of number per 36 cm<sup>2</sup> for SB; number per 40 cm<sup>2</sup> for ME. Codes are: LL=*L. littorea*, LO=*L. obtusata*, TT=*T. testudinalis*, NL=*N. lapillus*, SB=*S. balanoides*, ME=*M. edulis*.

| Species | Term  | posterior mean | lower 95% credible limit | upper 95% credible limit | Percentage of variation | Effective sample size |
|---------|-------|----------------|--------------------------|--------------------------|-------------------------|-----------------------|
| LL      | Site  | 0.359          | 0.112                    | 0.758                    | 49.81%                  | 1761                  |
|         | units | 0.362          | 0.298                    | 0.432                    | 50.19%                  | 2000                  |
| LO      | Site  | 0.462          | 0.116                    | 0.947                    | 30.46%                  | 2000                  |
|         | units | 1.056          | 0.855                    | 1.278                    | 69.54%                  | 2000                  |
| TT      | Site  | 2.533          | 0.464                    | 5.721                    | 60.66%                  | 2000                  |
|         | units | 1.643          | 1.018                    | 2.313                    | 39.34%                  | 2000                  |
| NL      | Site  | 1.072          | 0.275                    | 2.221                    | 37.92%                  | 2000                  |
|         | units | 1.754          | 1.265                    | 2.236                    | 62.08%                  | 1873                  |
| SB      | Site  | 0.308          | 0.038                    | 0.683                    | 23.71%                  | 2065                  |
|         | units | 0.990          | 0.671                    | 1.303                    | 76.29%                  | 2000                  |
| ME      | Site  | 0.661          | 0.177                    | 1.441                    | 37.51%                  | 2000                  |
|         | units | 1.101          | 0.868                    | 1.374                    | 62.49%                  | 2000                  |



**Supplementary Table 8.** Correlations over time among abundances of gastropods, and recruitment of mussels and barnacles based on residuals from fitted models. Panels A and C are correlations, and panels B and D are P-values (upper triangle) and sample sizes (lower triangle). Codes are: LL=*L. littorea*, LO=*L. obtusata*, TT=*T. testudinalis*, NL=*N. lapillus*, SB=*S. balanoides*, ME=*M. edulis*. Correlations and P-values are shown in bold when  $P < 0.05$ ; tests are two-sided.

| A: Pearson's correlations    |       |              |                  |                  |        |               | C: Spearman's correlations   |       |       |                  |                  |              |                  |
|------------------------------|-------|--------------|------------------|------------------|--------|---------------|------------------------------|-------|-------|------------------|------------------|--------------|------------------|
|                              | LL    | LO           | TT               | NL               | SB     | ME            |                              | LL    | LO    | TT               | NL               | SB           | ME               |
| LL                           | 1.000 | <b>0.137</b> | <b>0.300</b>     | 0.018            | 0.109  | 0.015         | LL                           | 1.000 | 0.013 | <b>0.418</b>     | <b>0.154</b>     | <b>0.130</b> | 0.028            |
| LO                           |       | 1.000        | 0.074            | 0.313            | 0.012  | <b>-0.169</b> | LO                           |       | 1.000 | -0.050           | <b>0.262</b>     | -0.125       | <b>-0.270</b>    |
| TT                           |       |              | 1.000            | 0.055            | -0.020 | -0.005        | TT                           |       |       | 1.000            | <b>0.369</b>     | 0.028        | <b>0.333</b>     |
| NL                           |       |              |                  | 1.000            | 0.144  | -0.081        | NL                           |       |       |                  | 1.000            | 0.092        | 0.008            |
| SB                           |       |              |                  |                  | 1.000  | -0.033        | SB                           |       |       |                  |                  | 1.000        | 0.046            |
| ME                           |       |              |                  |                  |        | 1.000         | ME                           |       |       |                  |                  |              | 1.000            |
| B: P-values and sample sizes |       |              |                  |                  |        |               | D: P-values and sample sizes |       |       |                  |                  |              |                  |
|                              | LL    | LO           | TT               | NL               | SB     | ME            |                              | LL    | LO    | TT               | NL               | SB           | ME               |
| LL                           |       | <b>0.020</b> | <b>&gt;0.001</b> | 0.764            | 0.097  | 0.828         | LL                           |       | 0.830 | <b>&gt;0.001</b> | <b>0.009</b>     | <b>0.047</b> | 0.689            |
| LO                           | 288   |              | 0.252            | <b>&gt;0.001</b> | 0.849  | <b>0.016</b>  | LO                           | 288   |       | 0.438            | <b>&gt;0.001</b> | 0.056        | <b>&gt;0.001</b> |
| TT                           | 239   | 239          |                  | 0.394            | 0.783  | 0.948         | TT                           | 239   | 239   |                  | <b>&gt;0.001</b> | 0.695        | <b>&gt;0.001</b> |
| NL                           | 288   | 288          | 239              |                  | 0.027  | 0.251         | NL                           | 288   | 288   | 239              |                  | 0.161        | 0.906            |
| SB                           | 235   | 235          | 196              | 235              |        | 0.649         | SB                           | 235   | 235   | 196              | 235              |              | 0.521            |
| ME                           | 202   | 202          | 169              | 202              | 197    |               | ME                           | 202   | 202   | 169              | 202              | 197          |                  |
