# Supplementary material for: Declines over the last two decades of five intertidal invertebrate species in the western North Atlantic
Source: PubMed Central journal article supplement (PMC7576203; doi:10.1038/s42003-020-01326-0), 2020-10-20
Supplement: 42003_2020_1326_MOESM3_ESM.pdf [file 42003_2020_1326_MOESM3_ESM.pdf]

## Description of Additional Supplementary Files

File Name: Supplementary Data 1

Description: Means for water temperature, pH, saturation ratio (Omega), snail abundances, and recruitment of barnacles and mussels. Columns labeled by month are average water temperatures at one m depth from the F01 buoy. Data for pH and omega are from published data<sup>19</sup>. Year column lists spring (e.g. 1997.3) and summer (e.g. 1997.5) sampling. Remaining columns are averages for abundances of *Littorina littorea* (LL), *Littorina obtusata* (LO), *Tectura testudinalis* (TT), *Nucella lapillus* (NL) and for recruitment of *Semibalanus balanoides* (SB) and *Mytilus edulis* (ME). Abundances are averages per 0.25 m<sup>2</sup>, which is the size of the sampling quadrat. Recruitment averages for *S. balanoides* are per surface area of sampling plate (39.6 sq. cm.) and for *M. edulis* are per sampling unit (approx. 40 cm<sup>2</sup>). NA indicates missing data. Temperature data for April 2017, May 2017 and October 2018 were imputed
